# Supplementary material
Source: Royal Society of Chemistry journal article supplement (doi:10.1039/d6tc00252h)
Supplement: d6tc00252h1.pdf [file d6tc00252h1.pdf]

## Supporting Information

### **Pressure effects on optical properties of Zinc-based 0D Hybrid Halides**

Yuan Fu,<sup>a</sup> Guoliang Xiao,<sup>a</sup> Xihan Yu,<sup>a</sup> Dianlong Zhao,<sup>\*b</sup> Guanjun Xiao<sup>\*a,c</sup>

<sup>a</sup>.State Key Laboratory of High Pressure and Superhard Materials, College of Physics, Jilin University, Changchun 130012.

<sup>b</sup>.Key Laboratory of New Energy and Rare Earth Resource Utilization of State Ethnic Affairs Commission, School of Physics and Materials Engineering, Dalian Minzu University, Dalian, 116600, China.

<sup>c</sup>.Department of Physics, Yanbian University, Yanji, 133002, China.

Corresponding authors: [zhaodl@dlnu.edu.cn](mailto:zhaodl@dlnu.edu.cn); [xguanjun@jlu.edu.cn](mailto:xguanjun@jlu.edu.cn);



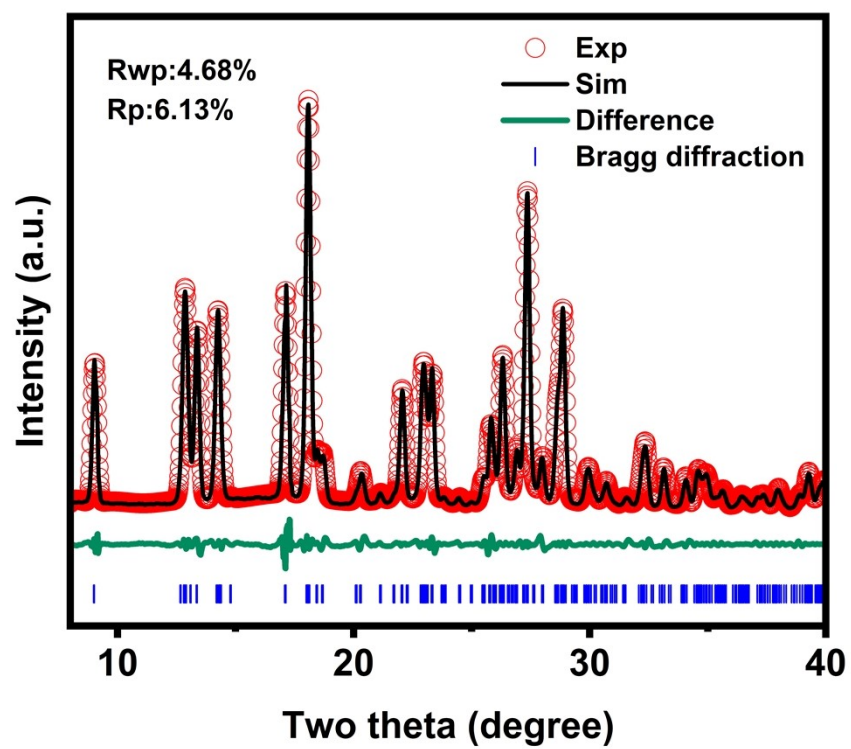

Fig. S1 Xrd of ZnCl<sub>2</sub>-BZT.

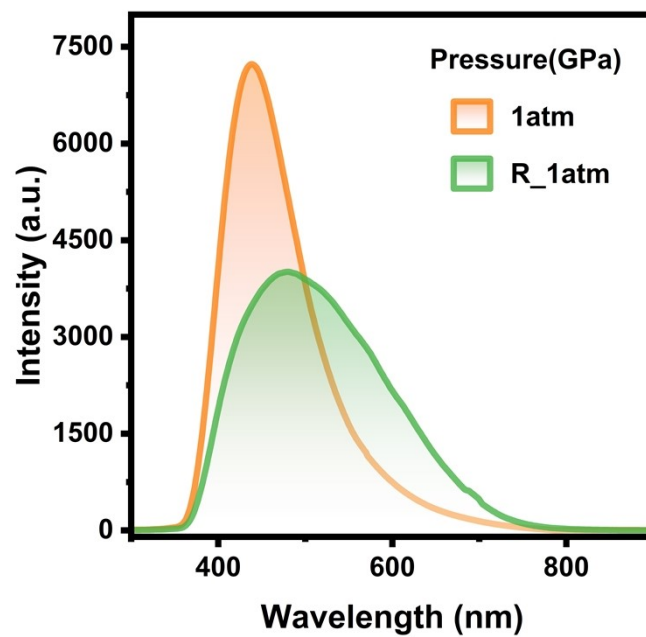

**Fig. S2** The comparison before and after high-pressure treatment of ZnCl<sub>2</sub>-CBZT PL spectra.

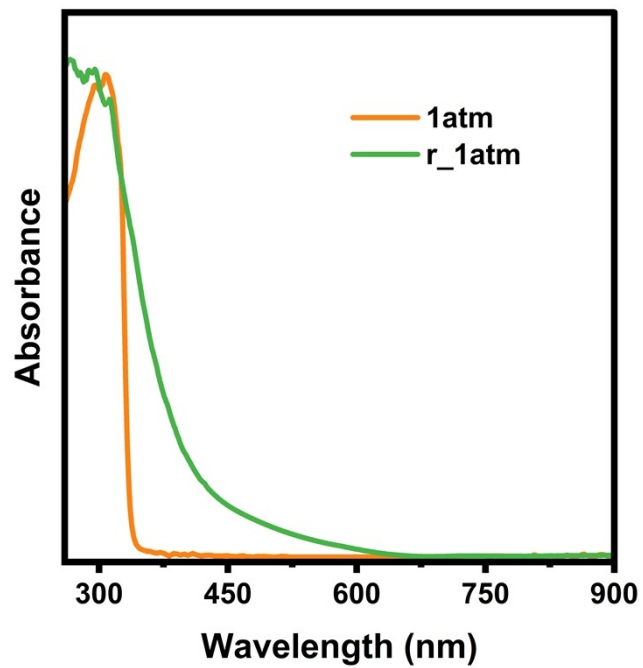

**Fig. S3** UV-Vis absorption spectra of ZnCl<sub>2</sub>-BZT before and after high pressure treatment.

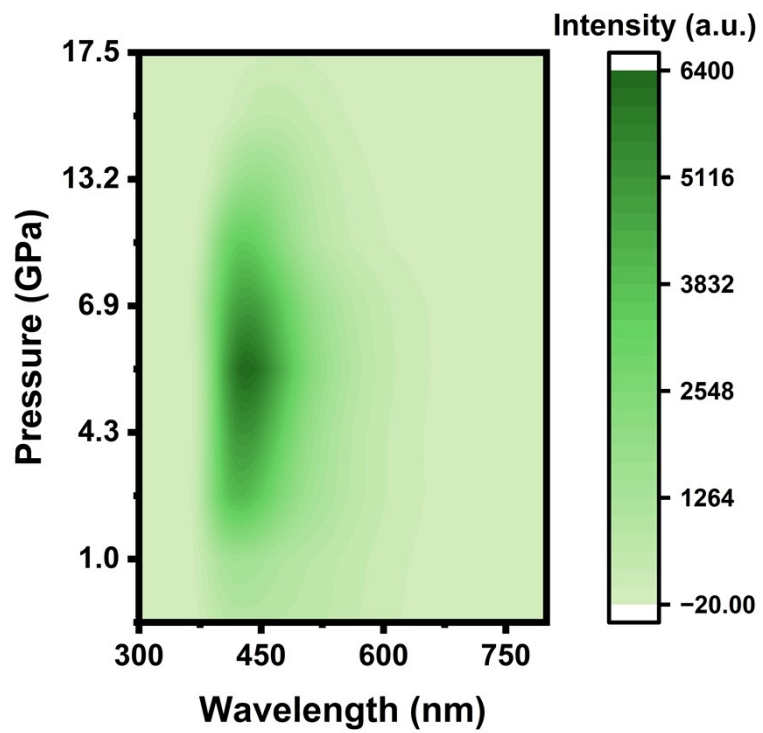

**Fig .S4** PL spectra of ZnCl<sub>2</sub>-BZT under high pressure (17.5 GPa).

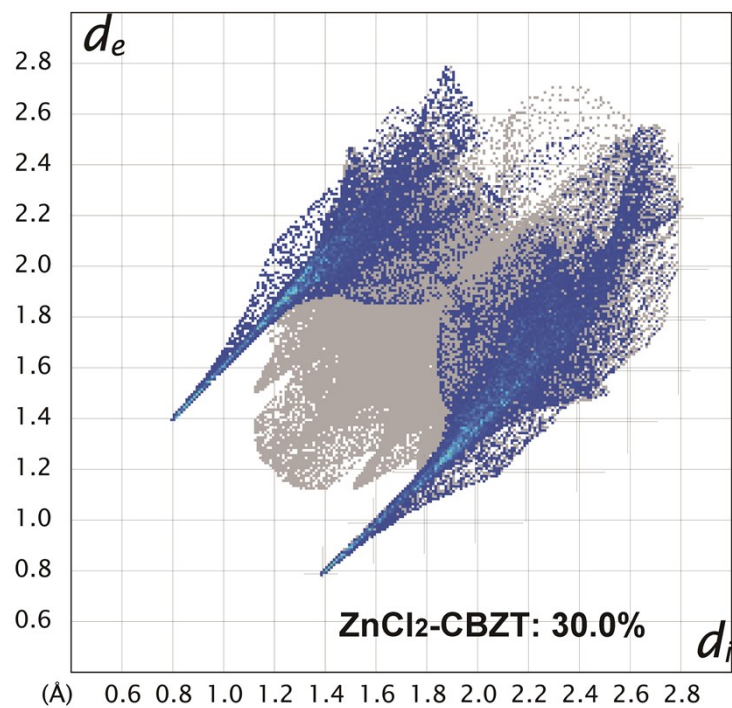

**Fig .S5** The Fingerprint plot of ZnCl<sub>2</sub>-CBZT at 1atm.

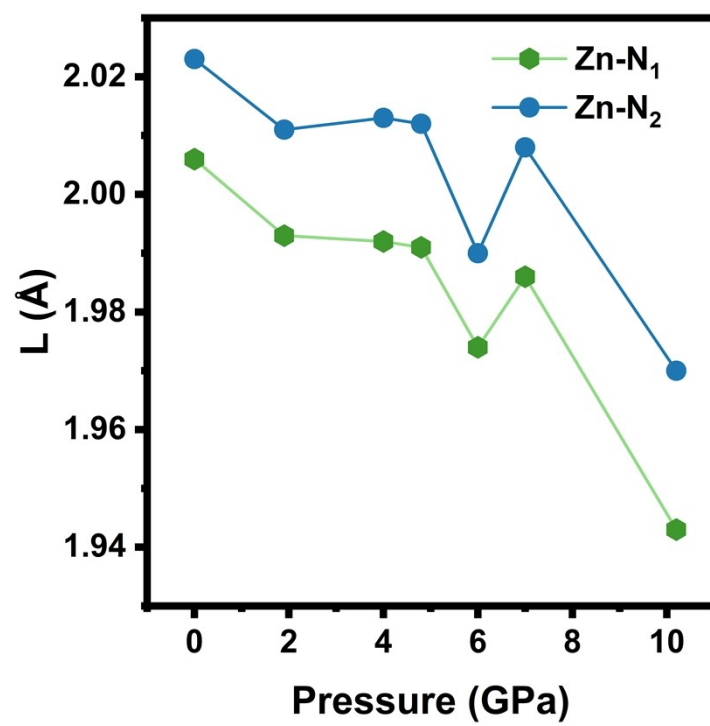

Fig .S6 Bond length of Zn-N under high pressure.

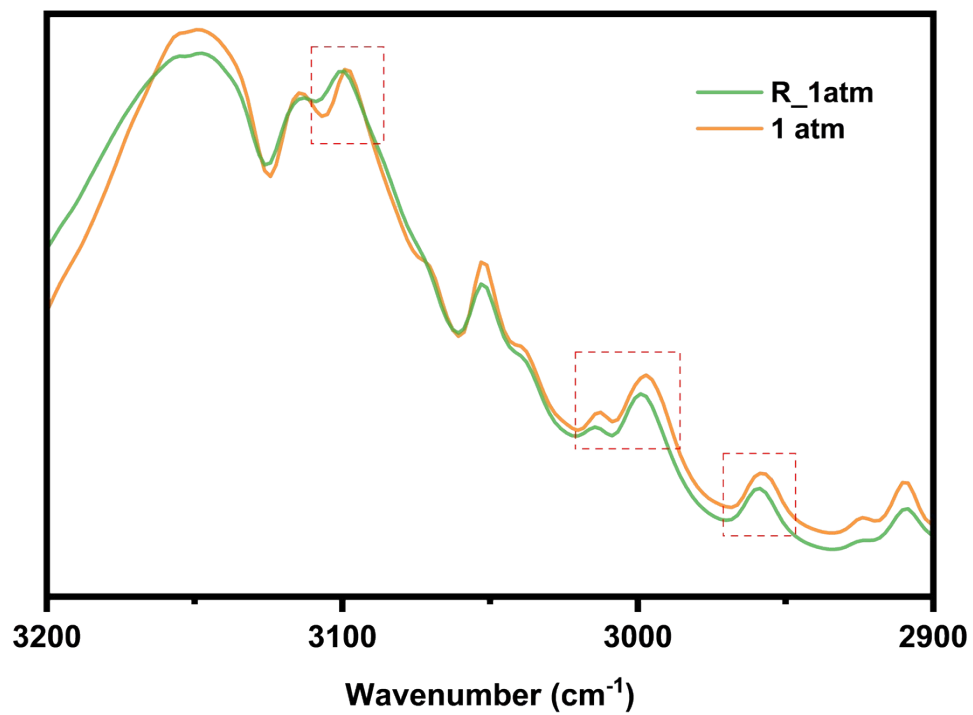

**Fig .S7** The blue shift of the N–H bond observed in the infrared spectrum after pressure release.

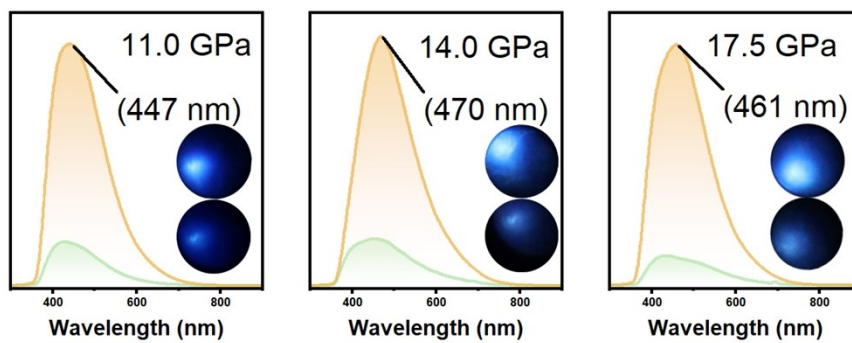

**Fig .S8** PL spectra harvest of ZnCl<sub>2</sub>-BZT under diffenent pressure.

**Table S1.** Distance between the Cl atom and the N atom of the organic moiety before and after high pressure treatment.

|        | N1-Cl1 (Å)   | N1-Cl2 (Å)   | N2-Cl1 (Å)   | N2-Cl2 (Å)   |
|--------|--------------|--------------|--------------|--------------|
| 1atm   | <b>3.389</b> | <b>3.475</b> | <b>3.567</b> | <b>3.411</b> |
| R-1atm | <b>3.357</b> | <b>3.452</b> | <b>3.529</b> | <b>3.360</b> |
